# Supplementary material for: Excess membrane binding of monomeric alpha-, beta- and gamma-synuclein is invariably associated with inclusion formation and toxicity
Source: PubMed Central journal article supplement (PMC8600006; doi:10.1093/hmg/ddab188), 2021-07-12
Supplement: fig_s1_2_ddab188.pdf [file fig_s1_2_ddab188.pdf]

transfected M17D cells

$\alpha$ S wt    $\alpha$ S 3K    $\beta$ S wt    $\beta$ S 3K

C   M   C   M   C   M   C   M

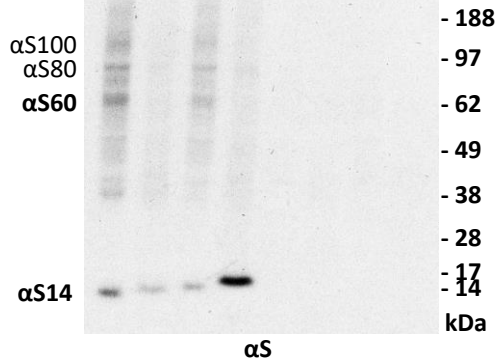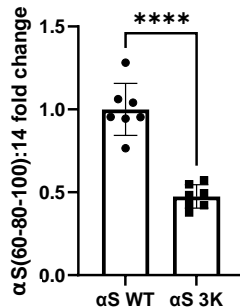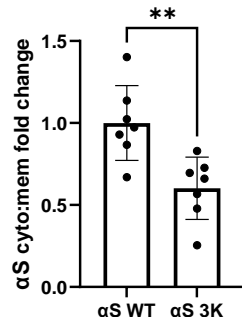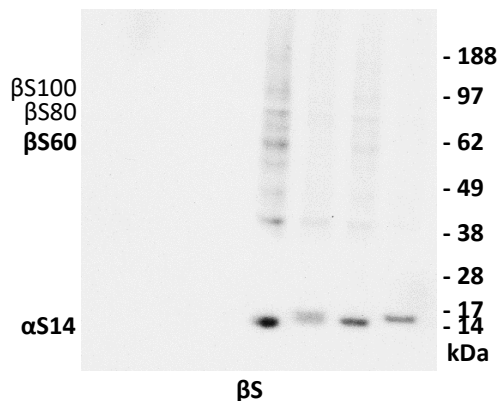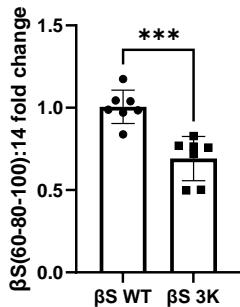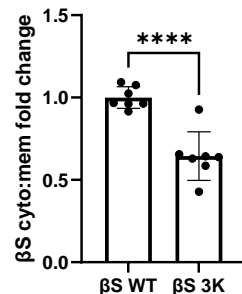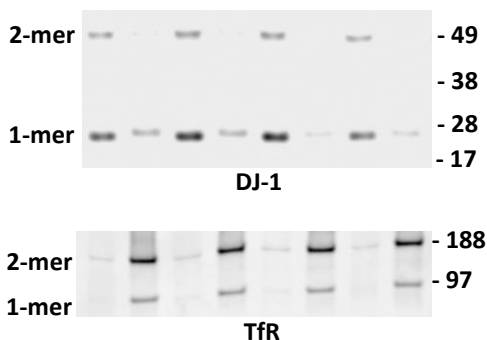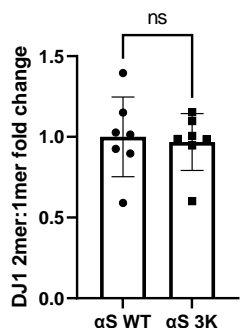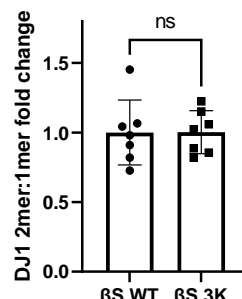

**Fig. S1:  $\alpha$ S and  $\beta$ S WT vs. 3K crosslinking/sequential extraction.** M17D neuroblastoma cells were transfected with the indicated constructs for 48 h and subjected to 1 mM DSG crosslinking followed by sequential extraction (PBS, cytosol = C; TX-100, membrane = M). WB for  $\alpha$ S,  $\beta$ S, DJ-1 and transferrin receptor (Tfr). N = 2 independent experiments performed in 3 and 4 biological replicates, respectively (n = 3, 4). Graphs are means  $\pm$  stdev; \*\*\*\*, p < 0.0001; \*\*\*, p < 0.001 \*\*, p < 0.01.

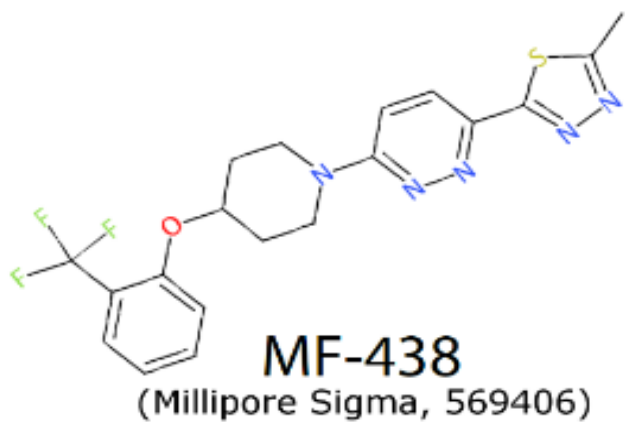

Fig. S2: Chemical Structure of the SCD inhibitor MF-438
